# Supplementary material for: Engineering of Saccharomyces cerevisiae for 24-Methylene-Cholesterol Production
Source: MDPI journal article supplement (doi:10.3390/biom11111710), 2021-11-17
Supplement: s1 [file s1]

## Supplementary Materials

Table S1. Primers used in this study.

| Primers Used for the Expression Cassette Construction |                                                   |
|-------------------------------------------------------|---------------------------------------------------|
| PhDWF5-F                                              | ATGGGGGAGTCTCAGTTGGC                              |
| PhDWF5-R                                              | CTAGTAAATTCGCGGTACGACCCTGT                        |
| Erg5-UP-F                                             | CCTTTAGTGAGGGTTGAATTCTGGTGTACTTCATTTCTCAATCAAA    |
| Erg5-UP-R                                             | CACAGCAGCATTGGAATTAGTCAAC                         |
| Erg5-PhDWF5-F                                         | CTAATTCCAATGCTGCTGTGTTTTATTTAGGTTCTATCGAGGAGAAA   |
| Erg5-PhDWF5-R                                         | CCGAAGATCAAGTCAGGCAAATTAAGCCTTCGAGCG              |
| Erg5-OsDWF5-F                                         | CTAATTCCAATGCTGCTGTGTTTTATTTAGGTTCTATCGAGGAGAAA   |
| Erg5-OsDWF5-R                                         | CCGAAGATCAAGTCAGGCAAATTAAGCCTTCGAGCG              |
| Erg5-XIDWF5-F                                         | CTAATTCCAATGCTGCTGTGTTTTATTTAGGTTCTATCGAGGAGAAA   |
| Erg5-XIDWF5-R                                         | CCGAAGATCAAGTCAGGCAAATTAAGCCTTCGAGCG              |
| Erg5-DOWN-F                                           | TTGCCTGACTTGATCTTCGGTAATATAGTTACC                 |
| Erg5-DOWN-R                                           | AGTGAGTCGTATTACGGATCCAGTTCTGGCCCATCATCGG          |
| Erg4-UP-F                                             | CCTTTAGTGAGGGTTGAATTCTCCACTGCTAATGTACTATATGTGGATT |
| Erg4-UP-R                                             | CGAAGAGCACCTAGGGTTTAGTGGAGCTCC                    |
| Erg4-GENE-F                                           | TAAACCCTAGGTGCTCTTCGCGCGTTTCGGT                   |
| Erg4-GENE-R                                           | TCTAACCTCGGTGATGGTTCACGTAGTGGGC                   |
| Erg4-DOWN-F                                           | GAACCATCACCGAGGTTAGATTACCTTGGTTCACC               |
| Erg4-DOWN-R                                           | AGTGAGTCGTATTACGGATCCCCATCAATCAATAGGTACGATCCA     |
| Primers Used for the Real-Time Quantitative PCR       |                                                   |
| ALG9-F                                                | GTGAACAATTACACAGCTCCTATAG                         |
| ALG9-R                                                | CCTATGATTATCTGGCAGCAGGAAAG                        |
| qPCR-XL-F                                             | CCTGCTTTGACTTGGACTGCTGT                           |
| qPCR-XL-R                                             | GTTCTAGCACCTTCTTGAACACC                           |

**Figure S1:**

**The amino acid sequences of *DHCR7* from *P. angulata*, *O. sativa*, and *X. laevis*:**

**a. *P. angulata***

MGESQLAHPPLFTYVSMLTLLTIVPPFIILMWYTNVHADGSILNTFNYLKENGLQGLIDIWP  
RPTAVAGKIIICYGLFEAALQILLPGKRVEGPISPTGHRPVYKANGVAAYTVTLITYLSLWW  
FGIFNPTIVYDHLGEILSTLNIGSLIFCLLLYIKGHVAPSSTDHGSSGNIIDFYWGMELYPRIG  
KHFDIKVFTNCRFGMISWALLPITYCIKQYEEYGSLSDSMLVHTIITLVYVTKFFWWEAGY  
WNTMDIAHDRAFGYICWGCLVFLPCIYTSPGMYLVKHPVNLGPQLALSILAAGILCVYIN  
YDCDRQRQEFRRTNKGAPVWGKAPSKIVASYTTTTGETKSSILLTSGWWGLARHFHYVPE  
ILASFFWCVPALFNHFIPYFYVVYLTVLLLDRAKRDDERCKAKYGKYWKKYCEKVPYRV  
VPGIY

**b. *O. sativa***

MAKPRASAAAAKAPASTPPKTVHSALVTYASMLSLLSLCPPFVILLWYTMVHADGSSVRA  
YEHLREHGVLEGLKAIWPMPTMAAWKIIIFGFGLEAALQLLLPGKRFEGPVSPSGNVPVY  
KANGLQAYAVTLITYLSLWWFGIFNPAIVYDHLGEIYSALVFGSFVFCIFLYIKGHLAPSSSD  
SGSSGNVIIDFYWGMELYPRIGKHFDIKVFTNCRFGMMSWAVLAVTYCIKQYEMNGRVAD  
SMLVNTALMLIYVTKFFWWESGYWCTMDIAHDRAFGYICWGCLVWVPSIYTSPGMYLV  
NHPVNLGPQLALSILLAGILCIYINYDCDRQRQEFRRTNKGCSIWGKAPSKIVASYQTTNGE  
TKSSLLLTSGWWGLSRHFHYVPEILSAFFWTVPALFDHFLPYFYVIFLTILLFDRAKRDDDR  
CSSKYGKYWKMYCNKVPKRVIPGIY

**c. *X. laevis***

MGERRRANASRGDKKVANGEKQHVQWGRAWEVDYFSLASVIFLLAFAPLIVYYFVMS  
CDQYQCALTAPVLDLYSGKARLSDIWDKTPALTWTAVKIYLAWVSFQVFLYMFLPDILH  
KFVPGYEGGVQEGARTPAGLINKYQVNLQAWTITHLLWFANAYHFHWFSPATIVDNWI  
PLLWCANLLGYSVATFALVKANFFPTNANDCKFTGNFFYDYMMGIEFNPRIGKWFDLKL  
FFNGRPGIVAWTLINLSYAAKQQELYGQVTNSMILVNVLQAIYVVDDFFWNESWYLKTIDI  
CHDHFGWYLGWGDCVWLPYLYTLQGLYLVYNPVELSTTA AVAVLLLGLIGYYIFRMTN  
HQQDLFRRTNGNCKIWGKKPKSIECFYVSADGKRHYSKLMISGFWGVARHLNYTGDLN  
GSLAYCLACGFDHLLPYFYFIYMTILLVHRCIRDEHRCSSKYGKDWKLYTSAVPYRLLPG  
LF
